# Supplementary material for: Developing self-healable and antibacterial polyacrylate coatings with high mechanical strength through crosslinking by multi-amine hyperbranched polysiloxane via dynamic vinylogous urethane
Source: Royal Society of Chemistry journal article supplement (doi:10.1039/c7ta04141a), 2017-01-01
Supplement: c7ta04141a1.pdf [file c7ta04141a1.pdf]

## Supporting Information

### **Developing self-healable and antibacterial polyacrylate coating with high mechanical strength through crosslinking by multi-amine hyperbranched polysiloxane *via* dynamic vinylogous urethane**

Youhao Zhang, Li Yuan, Qingbao Guan, Guozheng Liang\* and Aijuan Gu\*

State and Local Joint Engineering Laboratory for Novel Functional Polymeric Materials  
Jiangsu Key Laboratory of Advanced Functional Polymer Design and Application  
Department of Materials Science and Engineering,  
College of Chemistry, Chemical Engineering and Materials Science,  
Soochow University, Suzhou, 215123, China

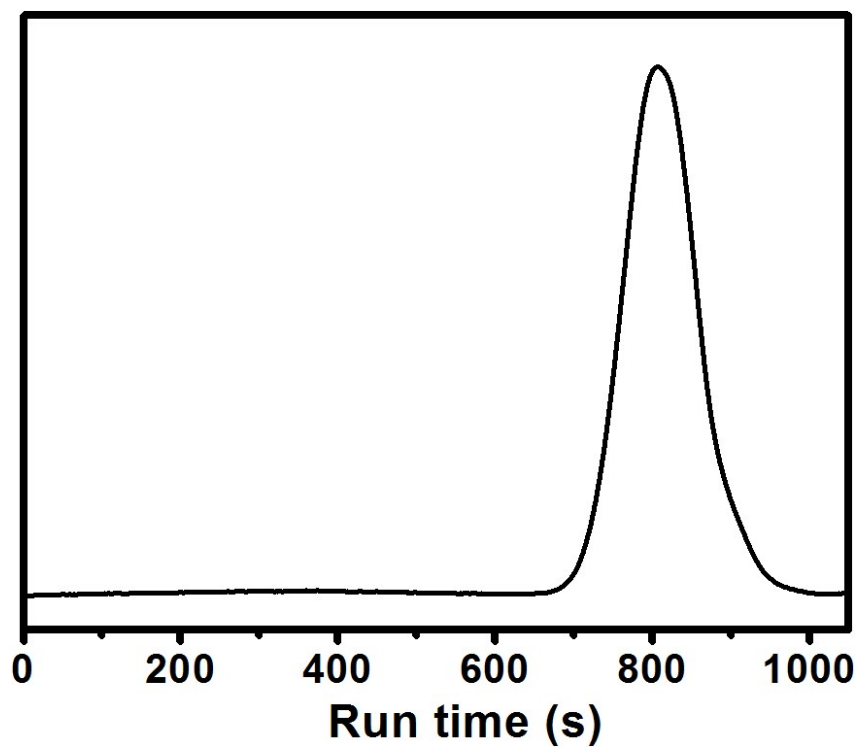

Fig. S1 GPC trace of LP.

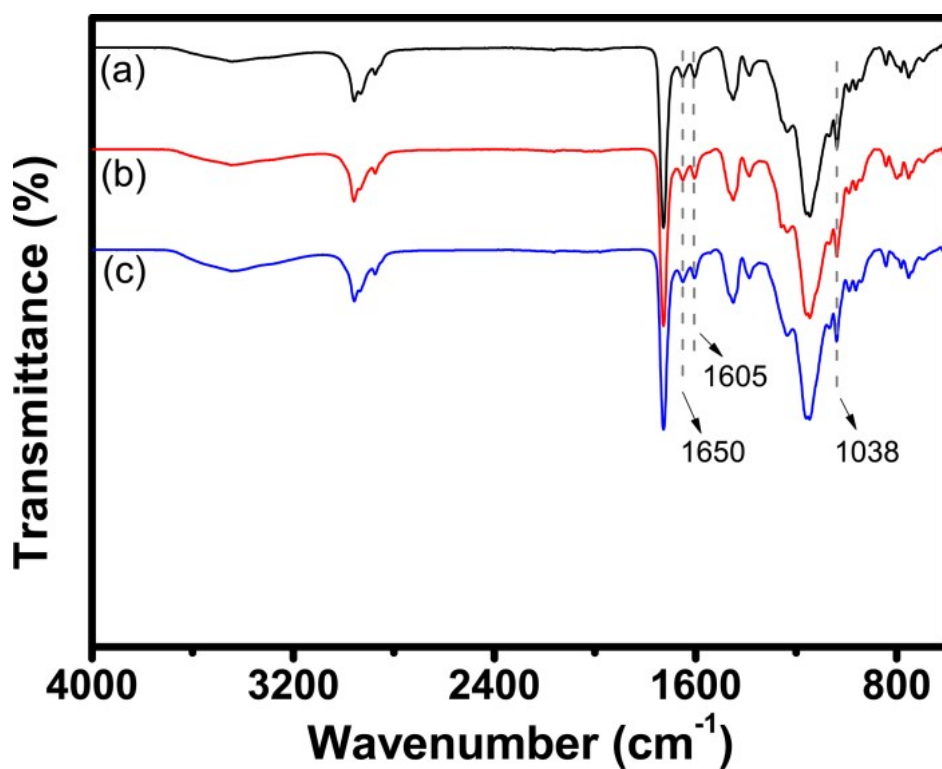

Fig. S2 FTIR spectra of fresh LP-HP6 (a) and those after placed under oxygen atmosphere (b) and immersed in ultrapure water (c).

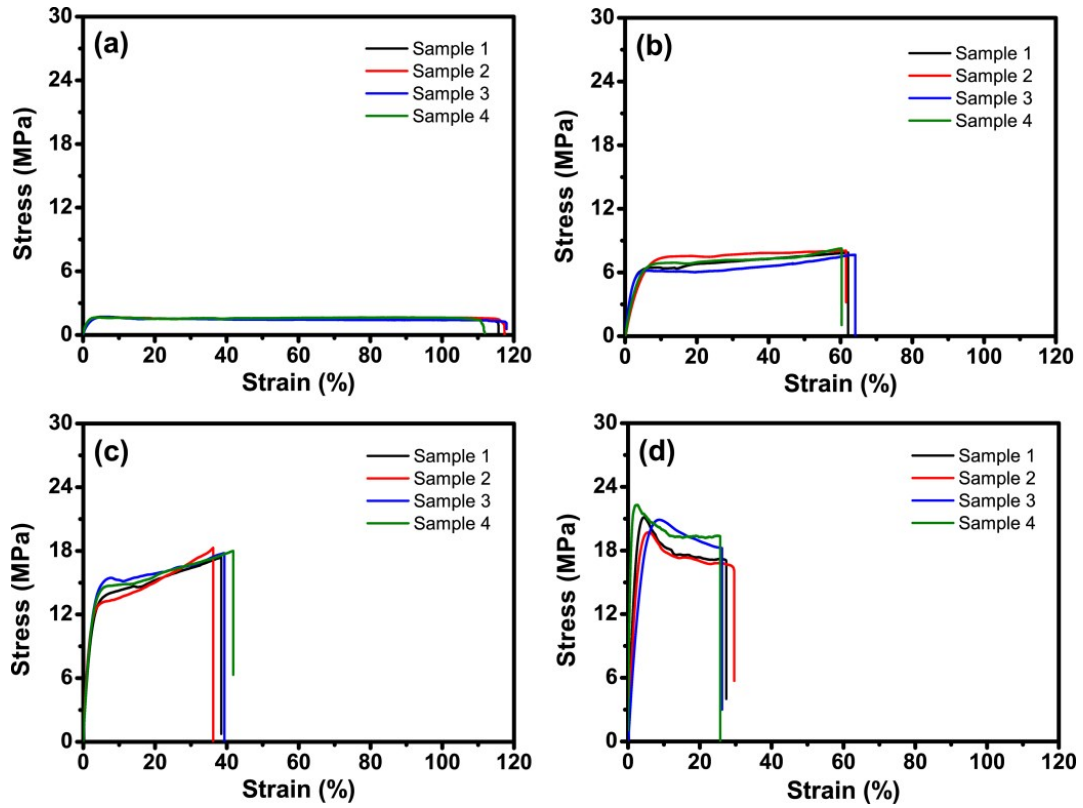

Fig. S3 Tensile stress-strain curves of LP (a) and LP-HP (b: LP-HP3; c: LP-HP6; d: LP-HP9) coatings.

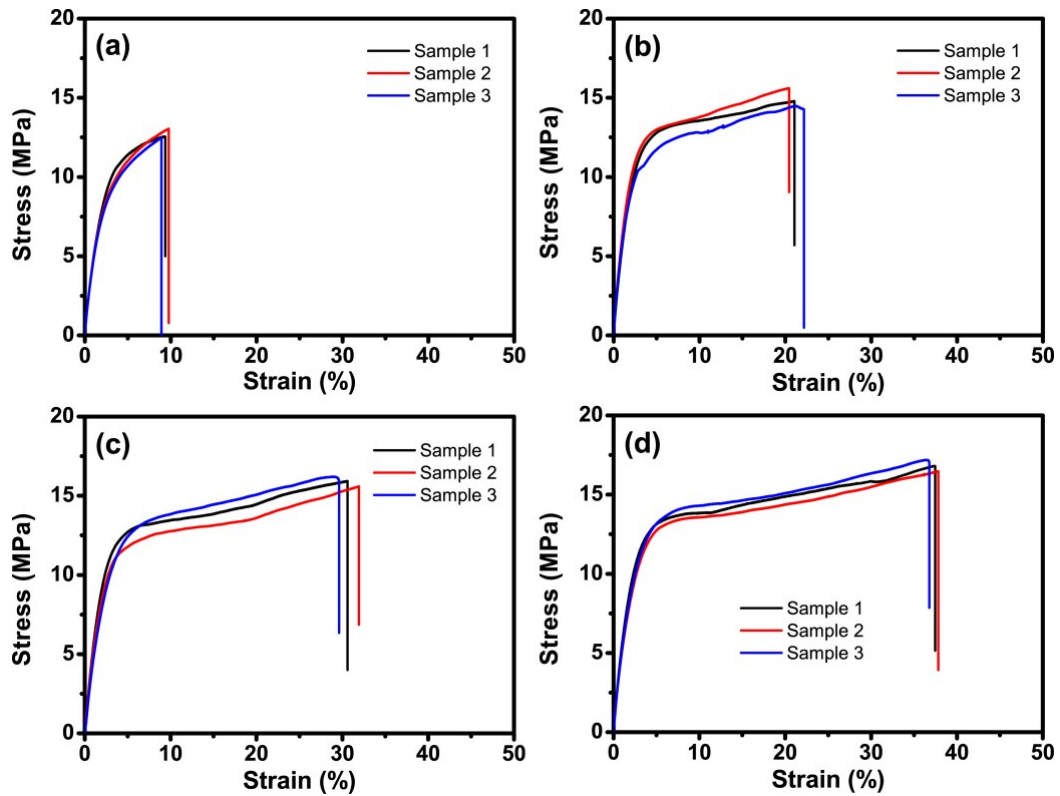

Fig. S4 Tensile stress-strain curves of scratched LP-HP6 coatings with different lengths of self-healing time (a: 0 h; b: 8 h; c: 16 h; d: 24 h).

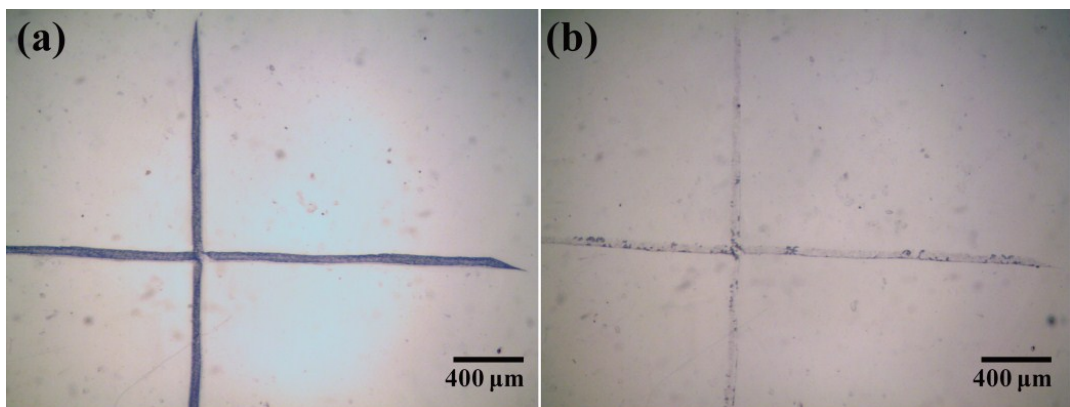

Fig. S5 Optical microscopic images of scratched LP-HP6 coating left in air for 24 h (a) and that after maintained at 60 °C for 24 h (b).

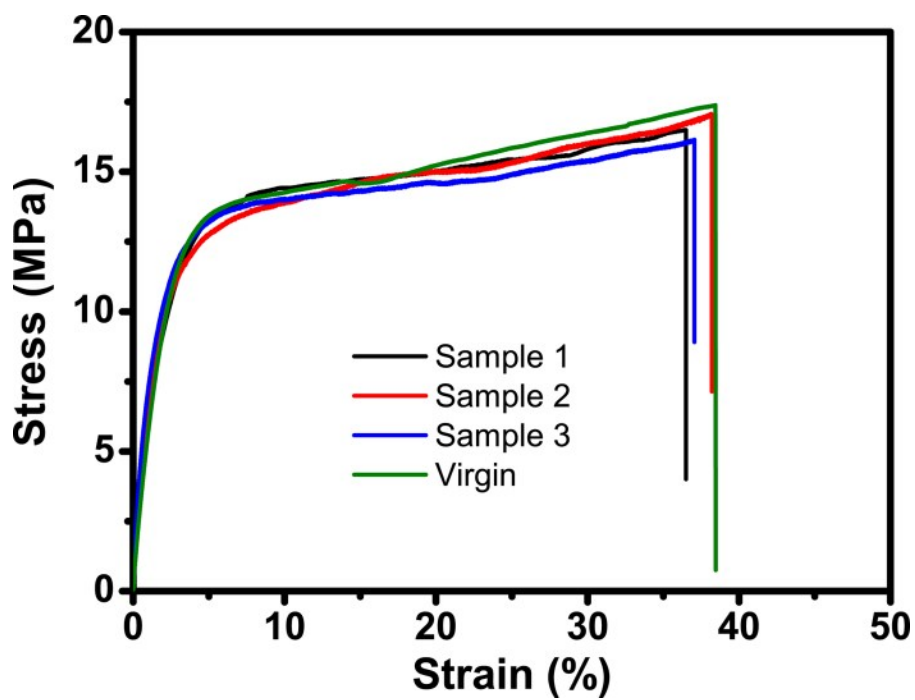

Fig. S6 Tensile stress-strain curves of scratched LP-HP6 coatings after 24 h self-healing (left in air for 24 h before self-healing).

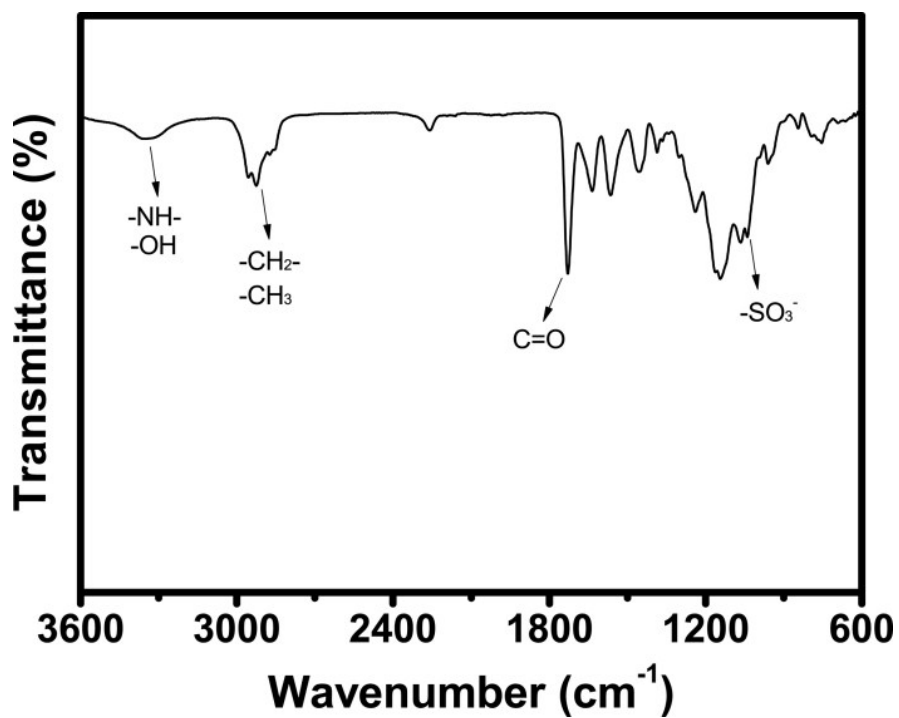

Fig. S7 FTIR spectrum of sLP-HP.

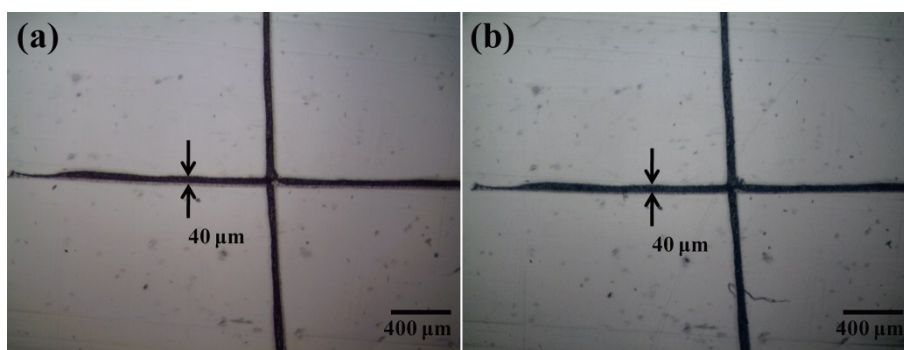

Fig. S8 Optical microscopic images of scratched sLP-HP coating (a) and that after maintained at 60 °C for 24 h (b).

Table S1 Initial degradation temperatures and char yields of LP-HP coatings

| Sample | Initial degradation temperature (°C) | Char yield at 800 °C (wt%) |
|--------|--------------------------------------|----------------------------|
| LP     | 266                                  | 0.58                       |
| LP-HP3 | 246                                  | 3.53                       |
| LP-HP6 | 250                                  | 6.99                       |
| LP-HP9 | 256                                  | 8.09                       |

Table S2 Typical self-healing properties of polyacrylate polymers

| Sample name      | Self-healing component                                        | $T_g$ (°C)              | $T_{di}$ (°C) | Self-healing condition | Self-healing efficiency | Photo <sup>b</sup> | $\sigma_b^c$ (MPa) | Ref       |
|------------------|---------------------------------------------------------------|-------------------------|---------------|------------------------|-------------------------|--------------------|--------------------|-----------|
| MP7              | terpyridine and metal ions                                    | 64                      | 191           | 120°C/23h              | -- <sup>a</sup>         | Yes                | --                 | S1        |
| MP9              |                                                               | 51                      | 256           | 90°C/17h               | --                      | Yes                | --                 |           |
| MP11             |                                                               | 33                      | 285           | 100°C/40h              | --                      | Yes                | --                 |           |
| MP12             |                                                               | 42                      | 319           | 60°C/16h               | --                      | Yes                | --                 |           |
| Poly(MMA-co-HEA) | trithioate                                                    | --                      | --            | UV/5min                | --                      | Yes                | --                 | S2        |
| MP1              | terpyridine and metal ions                                    | 85                      | 351           | 100°C/18h              | --                      | Yes                | --                 | S3        |
| MP3              |                                                               | 25                      | 354           | 80°C/80h               | --                      | Yes                | --                 |           |
| MP4              |                                                               | 36                      | 361           | 100°C/52h              | --                      | Yes                | --                 |           |
| MP9              |                                                               | 34                      | 352           | 90°C/60h               | --                      | Yes                | --                 |           |
| PBA-UPy7.2       | 2-ureido-4[1 H]-pyrimidinone (UPy)                            | 22                      | --            | R.T./50 h              | 100 %                   | --                 | --                 | S4        |
| FEF-2-BM         | Diels-Alder                                                   | -<br>33/90 <sup>d</sup> | --            | 120°C/4h,<br>25°C/24h  | --                      | Yes                | 14.2               | S5        |
| P2               | acylhydrazone                                                 | 45                      | 303           | 100°C/64h              | --                      | Yes                | --                 | S6        |
| P3               |                                                               | 101                     | 321           | 150°C/24h              | --                      | Yes                | --                 |           |
| MSP-3            | Zn <sup>2+</sup> and 2,6-bis(1'-methylbenzimidazolyl)pyridine | 24/<br>68.4             | --            | 140°C/25min            | 98%                     | Yes                | 4.4                | S7        |
| MSP-5            |                                                               | 39/<br>79.1             | --            | 140°C/25min            | 88%                     | Yes                | 9.7                |           |
| MSP-7            |                                                               | 46.8/<br>83             | --            | 140°C/25min            | 65%                     | Yes                | 12.5               |           |
| P20/80           | hydrogen bonds                                                | 33                      | --            | R.T./24h               | 95%                     | --                 | 2.9                | S8        |
| P20/80-CB5       |                                                               | -                       | --            | R.T./24h               | 83%                     | --                 | 4.1                |           |
| P20/80-CB20      |                                                               | 50                      | --            | R.T./24h               | 40%                     | --                 | 7.2                |           |
| PHEA-1.5% TMADA  | thiol-Michael adduct                                          | 9                       | --            | 90°C/16h               | 85%                     | --                 | 0.22               | S9        |
| PHEA-UPy         | 2-ureido-4[1 H]-pyrimidinone (UPy)                            | 45                      | 200           | R.T./2 h, 50% humidity | --                      | Yes                | --                 | S10       |
| MP2              | histidine and zinc salts                                      | 53                      | 322           | 120°C/20h              | --                      | --                 | --                 | S11       |
| MP3              |                                                               | 47                      | 295           | 70°C/38h               | --                      | Yes                | --                 |           |
| MP13             |                                                               | 46                      | 296           | 100°C/20h              | --                      | Yes                | --                 |           |
| MP14             |                                                               | 40                      | 297           | 150°C/40h              | --                      | Yes                | --                 |           |
| MP15             |                                                               | 42                      | 240           | 100°C/20h              | --                      | Yes                | --                 |           |
| LP-HP6           | Vinylogous urethane                                           | 57                      | 250           | 60°C/24h               | >92%                    | Yes                | 17.89 ± 0.42       | This work |

a. not characterized in the reference.

b. optical microscopic self-healing photos of the sample with Yeses were provided in the reference.

c. value of the virgin sample.

d.  $T_g$  values of soft domains and hard domains, respectively.

## References

- [S1] S. Bode, M. Enke, R. K. Bose, F. H. Schacher, S. J. Garcia, S. van der Zwaag, M. D. Hager and U. S. Schubert, *Journal of Materials Chemistry A*, 2015, **3**, 22145-22153.
- [S2] C. Cheng, X. Bai, X. Zhang, H. Li, Q. Huang and Y. Tu, *Journal of Polymer Research*, 2015, **22**, 46.
- [S3] M. Enke, R. K. Bose, S. Bode, J. Vitz, F. H. Schacher, S. J. Garcia, S. van der Zwaag, M. D. Hager and U. S. Schubert, *Macromolecules*, 2016, **49**, 8418-8429.
- [S4] A. Faghijnejad, K. E. Feldman, J. Yu, M. V. Tirrell, J. N. Israelachvili, C. J. Hawker, E. J. Kramer and H. Zeng, *Advanced Functional Materials*, 2014, **24**, 2322-2333.
- [S5] A. A. Kavitha and N. K. Singha, *Macromolecules*, 2010, **43**, 3193-3205.
- [S6] N. Kuhl, S. Bode, R. K. Bose, J. Vitz, A. Seifert, S. Hoepfener, S. J. Garcia, S. Spange, S. van der Zwaag, M. D. Hager and U. S. Schubert, *Advanced Functional Materials*, 2015, **25**, 3295-3301.
- [S7] Z. Wang, W. Fan, R. Tong, X. Lu and H. Xia, *RSC Advances*, 2014, **4**, 25486-25493.
- [S8] T. W. Xie, H. Zhang, Y. J. Lin, Y. Z. Xu, Y. H. Ruan, W. G. Weng and H. P. Xia, *RSC Advances*, 2015, **5**, 13261-13269.
- [S9] B. Zhang, Z. A. Digby, J. A. Flum, P. Chakma, J. M. Saul, J. L. Sparks and D. Konkolewicz, *Macromolecules*, 2016, **49**, 6871-6878.
- [S10] D. Zhu, Q. Ye, X. Lu and Q. Lu, *Polymer Chemistry*, 2015, **6**, 5086-5092.
- [S11] M. Enke, S. Bode, J. Vitz, F. H. Schacher, M. J. Harrington, M. D. Hager and U. S. Schubert, *Polymer*, 2015, **69**, 274-282.



Table S3 Summary of tensile properties for LP-HP coatings in tensile tests

| Coating | Property         | Sample 1 | Sample 2 | Sample 3 | Sample 4 | Average | Standard deviation |
|---------|------------------|----------|----------|----------|----------|---------|--------------------|
| LP      | $\sigma_b$ (MPa) | 1.71     | 1.65     | 1.67     | 1.69     | 1.68    | 0.03               |
|         | $\epsilon_b$ (%) | 115.65   | 117.52   | 118.32   | 111.94   | 115.86  | 2.84               |
|         | E (MPa)          | 61.54    | 60.32    | 63.97    | 63.97    | 61.07   | 2.31               |
|         | Toughness (MPa)  | 1.73     | 1.84     | 1.76     | 1.76     | 1.75    | 0.06               |
| LP-HP3  | $\sigma_b$ (MPa) | 7.87     | 8.15     | 7.69     | 8.26     | 7.99    | 0.26               |
|         | $\epsilon_b$ (%) | 62.1     | 60.51    | 64.83    | 60.25    | 61.92   | 2.10               |
|         | E (MPa)          | 207.66   | 187.02   | 215.87   | 190.32   | 200.22  | 13.81              |
|         | Toughness (MPa)  | 4.28     | 4.5      | 4.11     | 4.20     | 4.27    | 0.16               |
| LP-HP6  | $\sigma_b$ (MPa) | 17.35    | 18.36    | 17.84    | 18.01    | 17.89   | 0.42               |
|         | $\epsilon_b$ (%) | 38.18    | 36.21    | 39.51    | 41.77    | 38.92   | 2.34               |
|         | E (MPa)          | 429.43   | 450.36   | 425.73   | 440.70   | 436.56  | 11.19              |
|         | Toughness (MPa)  | 5.64     | 5.33     | 5.83     | 6.1      | 5.72    | 0.32               |
| LP-HP9  | $\sigma_b$ (MPa) | 21.12    | 19.73    | 20.95    | 22.37    | 21.04   | 1.08               |
|         | $\epsilon_b$ (%) | 27.35    | 29.59    | 26.14    | 25.68    | 27.19   | 1.75               |
|         | E (MPa)          | 725.09   | 650.26   | 635.47   | 780.77   | 697.89  | 67.75              |
|         | Toughness (MPa)  | 4.78     | 4.96     | 4.67     | 5.04     | 4.86    | 0.17               |

Table S4 Summary of tensile properties for each scratched LP-HP6 coatings with different lengths of self-healing time

| Coating                    | Property            | Sample 1 | Sample 2 | Sample 3 | Average | Standard deviation |
|----------------------------|---------------------|----------|----------|----------|---------|--------------------|
| Virgin<br>(0 h)            | $\sigma_b$ (MPa)    | 12.53    | 13.07    | 12.44    | 12.68   | 0.34               |
|                            | $\varepsilon_b$ (%) | 9.34     | 9.76     | 8.89     | 9.33    | 0.44               |
|                            | Toughness (MPa)     | 0.92     | 0.96     | 0.83     | 0.90    | 0.07               |
| After 8 h<br>self-healing  | $\sigma_b$ (MPa)    | 14.77    | 15.6     | 14.07    | 14.81   | 0.77               |
|                            | $\varepsilon_b$ (%) | 21.05    | 20.11    | 22.60    | 21.25   | 1.26               |
|                            | Toughness (MPa)     | 2.68     | 2.70     | 2.72     | 2.70    | 0.02               |
| After 16 h<br>self-healing | $\sigma_b$ (MPa)    | 15.89    | 15.17    | 17.12    | 16.06   | 0.98               |
|                            | $\varepsilon_b$ (%) | 30.53    | 32.56    | 28.56    | 30.55   | 2.00               |
|                            | Toughness (MPa)     | 4.12     | 4.08     | 4.03     | 4.08    | 0.05               |
| After 24 h<br>self-healing | $\sigma_b$ (MPa)    | 16.79    | 15.89    | 17.81    | 16.83   | 0.96               |
|                            | $\varepsilon_b$ (%) | 37.45    | 38.2     | 36.23    | 37.29   | 0.99               |
|                            | Toughness (MPa)     | 5.32     | 5.2      | 5.39     | 5.30    | 0.09               |

Table S5 Summary of tensile properties of scratched LP-HP6 coatings after 24 h self-healing (left in air for 24 h before self-healing).

| Property            | Sample 1 | Sample 2 | Sample 3 | Average | Standard deviation |
|---------------------|----------|----------|----------|---------|--------------------|
| $\sigma_b$ (MPa)    | 16.35    | 17.03    | 16.14    | 16.50   | 0.46               |
| $\varepsilon_b$ (%) | 36.21    | 38.13    | 37.01    | 37.11   | 0.94               |
| Toughness (MPa)     | 5.19     | 5.44     | 5.20     | 5.27    | 0.14               |

Table S6 Self-healing efficiencies of scratched LP-HP6 coatings after 24 h self-healing (left in air for 24 h before self-healing)

| Property        | Virgin (No scratch) | After 24 h self-healing |
|-----------------|---------------------|-------------------------|
| $\sigma_b$      | Value (MPa)         | 17.89±0.42              |
|                 | Efficiency (%)      | -                       |
| $\varepsilon_b$ | Value (%)           | 38.92 ±2.34             |
|                 | Efficiency (%)      | -                       |
| Toughness       | Value (MPa)         | 5.72 ±0.32              |
|                 | Efficiency (%)      | -                       |
